# Supplementary material
Source: ML conference proceedings conference paper supplement (https://openreview.net/forum?id=FDaHjwInXO)
Supplement: supplementary_material [file attachment]

## A EXAMPLE OF TRAINING PAIRS FOR RETRIEVAL MODULE

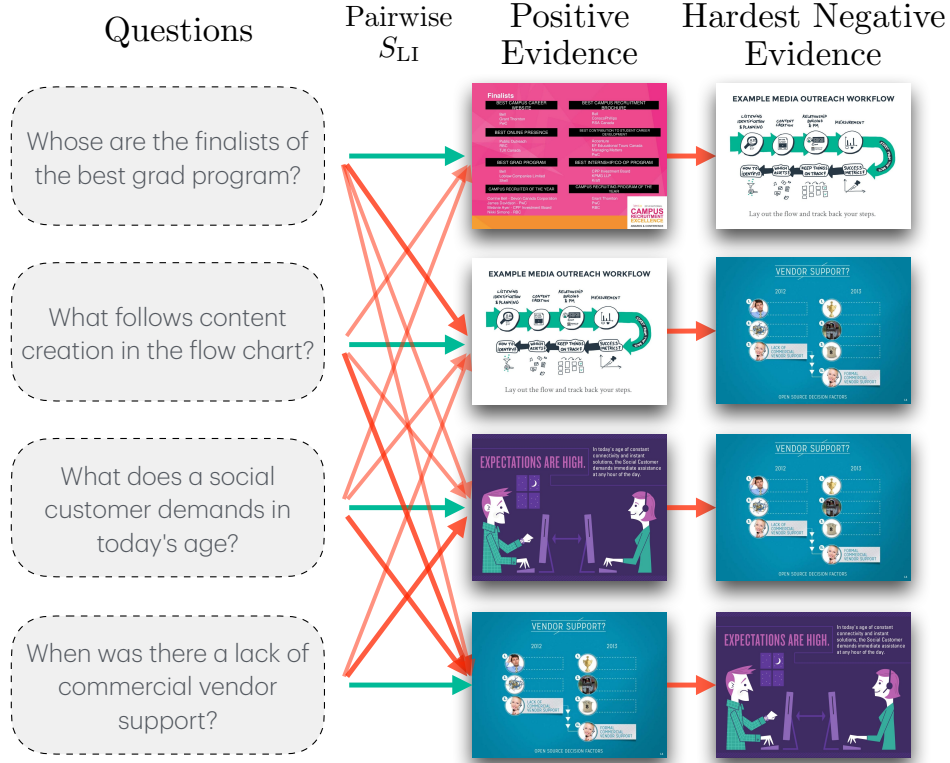

Figure A.1: Example of training pairs within a batch (batch size: 4) for contrastive training, using samples from the SlideVQA dataset.

## B EVALUATION METRICS

We evaluate the model’s performance on evidence retrieval and question-answering using five metrics explained as follows:

**Top-k Accuracy** In our experiment, we focus on questions that have evidence from a single page. We use top-k accuracy to evaluate retrieval methods, which measures the percentage of times the evidence image appears within the top k most similar images.

**Exact Match** Following (Tanaka et al., 2023), we report exact match (EM) frequency between generated answers and the ground truth, allowing for case insensitivity and extra spaces. While effective for fine-tuned models, this metric is less suited for LLM responses, which often include full sentences. Correct answers with extra context may thus be unfairly penalized.

**Generalized Accuracy** We report generalized accuracy (G-Acc) from MMLongBench-Doc (Ma et al., 2024d), a GPT-dependent, rule-based evaluation protocol. Model responses are simplified using GPT-4o and scored based on answer-type-specific rules. However, G-Acc has two limitations: it introduces randomness from GPT’s stochastic outputs and relies on answer-type annotations, limiting its applicability across datasets.

**ANLS** Average Normalized Levenshtein Similarity (ANLS) (Biten et al., 2019) measures the similarity between predicted and ground truth text using the Levenshtein distance, normalized by the longer string’s length. It outputs a similarity score between 0 and 1. ANLS allows mismatches, insertions, and deletions making it useful for OCR and document understanding tasks when exact matches are not required.

**PNLS** The *partial normalized Levenshtein similarity* (PNLS) (Chen et al., 2024b) generalizes ANLS by not penalizing extra prefixes or suffixes while allowing mismatches, insertions, and deletions within the matched region. This makes it more suitable for evaluating LLM responses, which are often verbose to improve user experience.

The PNLS metric is formally defined as follows: String  $\mathcal{T}_{1,m} = t_1 \dots t_m$  represents the true answer and  $\mathcal{S}_{1,n} = s_1 \dots s_n$  is a model generated string. We first use using the approximate string matching algorithm (Sellers, 1980) to identify the sub-string of  $\mathcal{S}$  that has the minimum edit distance to  $\mathcal{T}$ . Specifically, we first construct a scoring matrix  $\mathbf{F}$  of size  $(m+1) \times (n+1)$ , where  $F_{i,j}$  stores the smallest edit distance between the  $i$ -prefix  $\mathcal{T}_{1,i}$  and any sub-string  $\mathcal{S}_{x,j}$ ,  $\forall x \in \{1, \dots, j-1\}$  that ends at position  $j$ . The scoring matrix can be computed recursively

$$F_{i,j} = \begin{cases} 0 & \text{if } i = 0 \\ m & \text{if } j = 0 \\ \min \begin{pmatrix} F_{i-1,j-1} + c(t_i, s_j) \\ F_{i-1,j} + 1 \\ F_{i,j-1} + 1 \end{pmatrix} & \text{otherwise,} \end{cases}$$

where  $c$  is the substitution cost that takes a value of 0 if  $t_i = s_j$  and 1 otherwise. Once  $\mathbf{F}$  is computed, the minimum value in the last row is the optimal edit distance and the end index of the matched sub-string  $j' = \arg \min_j (F_{m+1,j})$ . The start index  $i'$  can be found by tracing back the the computation of Eq.(B) using  $\arg \min$  operation. Finally, the PNLS is computed as:  $m/(m+j'-i'+1)$ . In our experiments we use binary cost function:  $c(t_i, s_j) = 0$  if  $t_i = s_j$  else  $c(t_i, s_j) = 1$

## C EXAMPLE OF INFERENCE FAILURE SCENARIO

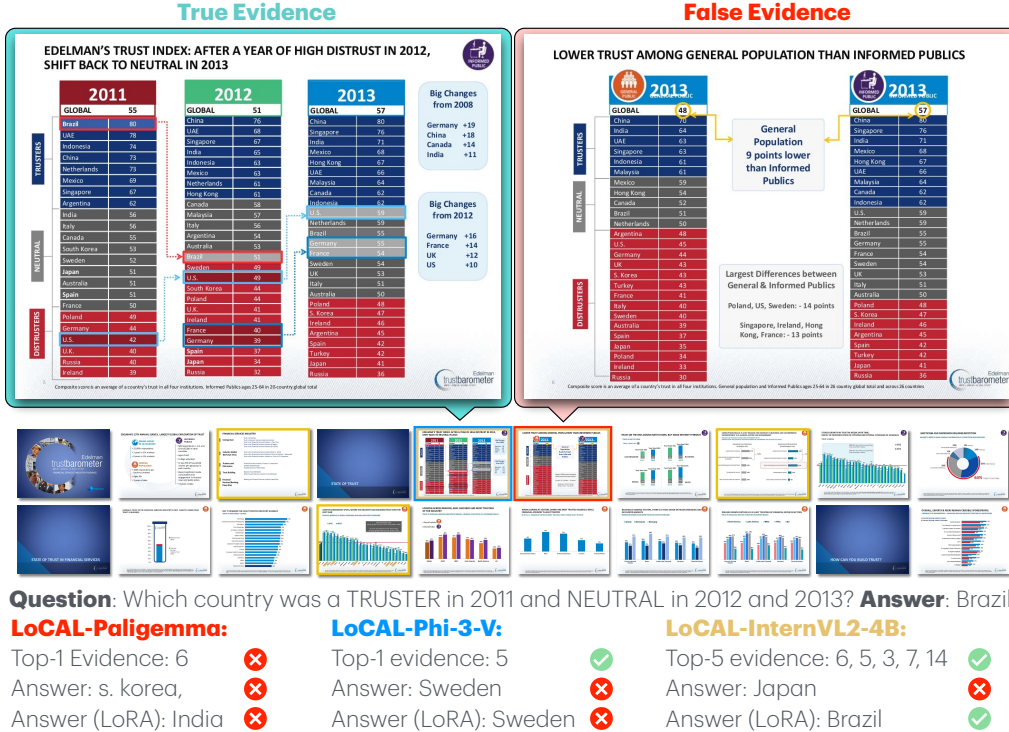

Figure C.1: Inference example of a challenging case in the SlideVQA dataset. SV-RAG-Paligemma retrieved the wrong evidence page due to limitations in its retrieval module, leading to an incorrect answer. SV-RAG-Phi-3-V retrieved the correct page but provided a wrong answer due to limitations in its QA module. Meanwhile, SV-RAG-InternVL2-4B also assigned the highest relevance score to an incorrect page. However, since it processes multiple pages (top 5), the correct evidence page was included in the input, allowing its fine-tuned QA module to deliver the correct answer.

## C.1 ADDITIONAL EXAMPLES OF RETRIEVAL FAILURES

**Question:** What types of data about your market should be researched?  
**Answer:** volume, profile, behavior, pain, needs, expectations

**THE « PESTO » SWOT ANALYSIS**

| Economy & competition                                                                                                                                                                                                                          | Social & user experience                                                                                                                                                                                                                                                                                                                                | Political & legal                                                                                                                                                                                                                                                                                                                            | Technology & tools                                                                                                                                                                                                                                                                                                                                                                                                       | Your organization                                                                                                                                                                                                                         |
|------------------------------------------------------------------------------------------------------------------------------------------------------------------------------------------------------------------------------------------------|---------------------------------------------------------------------------------------------------------------------------------------------------------------------------------------------------------------------------------------------------------------------------------------------------------------------------------------------------------|----------------------------------------------------------------------------------------------------------------------------------------------------------------------------------------------------------------------------------------------------------------------------------------------------------------------------------------------|--------------------------------------------------------------------------------------------------------------------------------------------------------------------------------------------------------------------------------------------------------------------------------------------------------------------------------------------------------------------------------------------------------------------------|-------------------------------------------------------------------------------------------------------------------------------------------------------------------------------------------------------------------------------------------|
| Think about your industry, i.e. overall revenues generated, clients, users, prospects, competitors, and partners. What are the trends in your market? What are the main challenges it is currently going through? What are its main strengths? | How is your industry impacted by social trends, i.e. the way the society operates and the psychological factors that can be associated to current behaviors? Are there any successful developments in terms of user/client experiences you could benefit from? Which market data do you have to measure these social trends, opportunities and threats? | Is your market highly regulated? By whom? How decisions taken by the legal & justice authorities may impact your industry? Who are the organizations that influence or exert pressure from the authorities? For what purpose? Do you face any legal limitations to operate on your target market? How to take advantage of this environment? | How technologies and existing systems impact your market? Think of the technologies and IT solutions needed to build and maintain IT infrastructures, the administrator side of software (back-end) and the user side of it (front-end). Is this current environment meeting the demand of the market? What can be considered as the major advantage and disadvantage of the technological environment in your industry? | Is your company structured and organized effectively to meet the demand of your market and maintain its competitive advantage? What are the strengths of your organization in this context, and which ones require improvement or change? |

Find reliable data about your market (volume, profile, behavior, pain, needs, expectations), and use them to draw up your conclusions.

**CCD#2 - MARKET ANALYSIS**

Market Analysis  
 Created Dynamilis Canvas #2

Strengths & Opportunities

Weaknesses & Threats

Key success factor to act upon

Main risk to act upon

**Question:** In which country is the GWP smallest? **Answer:** Denmark

**PROTECTOR**  
 Gross written premium Q2 2015

GWP up 17%, from NOK 542 m to NOK 635 m

- Commercial sector Scandinavia: 22% growth
  - Norway: 2 % growth within the commercial and public lines of business
  - Sweden: 17 % growth
  - Denmark: 45% growth
- Change of ownership insurance: 5 % growth
  - High turnover in the real estate market and increased real estate prices
- Continued product diversification

GWP Q2 2011-2015

GWP H1 2011-2015

Denmark, Sweden, Norway

**PROTECTOR**  
 Highlights Q2 2015 – Sweden

GWP 2011-2015

- 171 % growth
  - 2 very large, 4 large wins, one large non-renewal
  - No. 2 in the municipality segment
  - Renewal rate 89%
  - Growth leads to higher Q2 costs (provisions)
- Net combined 109.2%, 92.9% 1H 2015
  - Some medium large claims
  - Some segment oriented profitability actions implemented with effect from 2016 (as always)
- 33 employees/FTEs, strong organization
- Product mix: Auto: 56% - Prop: 25% - Liability 11% - Other 8%
- Strong volume start on Q3

**Question:** What are three types of chemical damage to concrete?  
**Answer:** AAR/ASR, Chemical Exposure, Bacterial action

**CONCRETE, DAMAGE AND DEFECTS**

PHYSICAL

CHEMICAL

MECHANICAL

AAR/ASR, Chemical Exposure, Bacterial action

**CONCRETE DAMAGE DUE TO REINFORCEMENT CORROSION**

STRAY/ELECTRIC CURRENT

CARBONATION

CHLORIDES

**True Evidence** **Retrieved Top 1 Evidence**

Figure C.2: Failure cases from the SlideVQA dataset, highlighting retrieval module errors. In the first two examples, some of the relevant information (highlighted in red boxes) on the true evidence pages is difficult even for human eyes to detect. In the third example, the retrieved page has a high similarity to the true evidence page, making it challenging to rank correctly. Additionally, answering the question accurately requires a deep understanding of the concept of chemical damage and related topics.

## D QAULITATIVE RESULTS IN QUESTION-ANSWERING

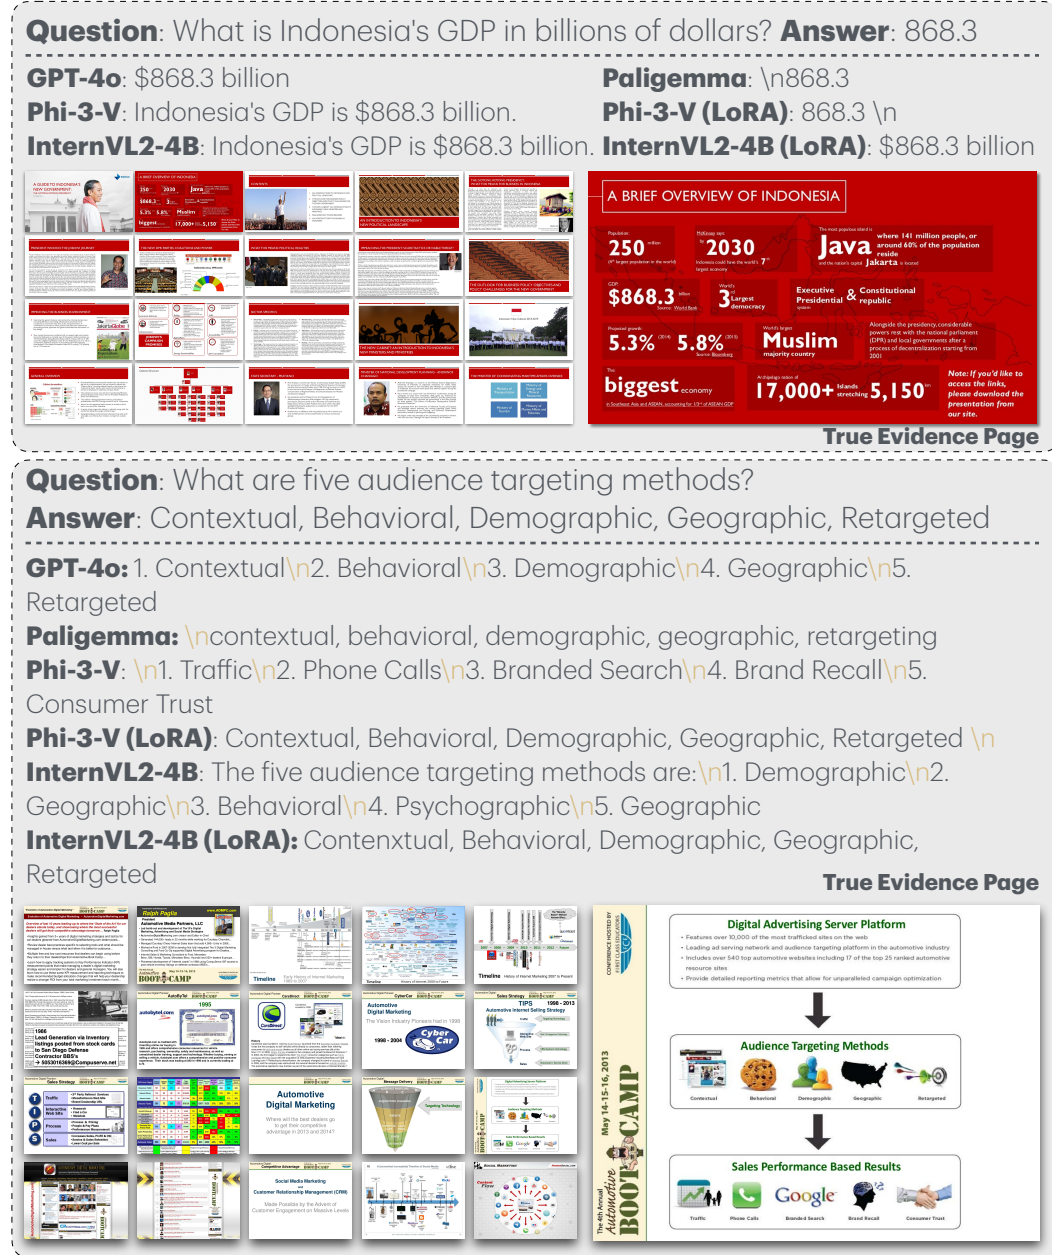

Figure D.1: Question answering examples on the SlideVQA dataset using different QA modules. Models without fine-tuning, such as Phi-3-V and InternVL2-4B, tend to produce verbose and error-prone responses. However, in the second example, fine-tuning with the LoRA adapter significantly improves the accuracy of Phi-3-V and InternVL2-4B.



## E EXAMPLES FROM THE VISR-BENCH DATASET

**Question:** What are the four listed advantages of the "High-Energy Blood Phosphates" procedure as presented at the convention in November 1965?

**True Answer:** The four advantages are: 1. Simple, 2. Sensitive, 3. Accurate, 4. Reproducible. ✓

**Text only answer:** The four advantages are: 1. Requires no expensive equipment, 2. Saves hours in laboratory diagnosis, 3. Requires only 0.5 ml. of blood, 4. Consumes less than ten minutes. ✗ **Hallucination**

Figure E.1: Example question-and-answer pair from the VisR-Bench dataset, highlighting the reliance on both image and surrounding text for accurate responses.

10.3. COMMUNICATIONS MODEL 95

services such as name services, task and sessions management, and distributed data services for inventory management. The main feature of the generic approach is the common distributed applicability of framework functions as well as framework executables from the standard user interface.

The provided interfaces for runtime-integration supports in-process-interfaces for plugins and inter-process interfaces for framework tools and wrapper calls.

Figure 10.6: ctys distributed components

Thus an integrated custom application is capable for distributed operations by default, where a basic version management for distributed compatibility issues is integrated.

### 10.3 Communications Model

The communications between entities within the UnifiedSessionManager is modeled around the basic idea of transparent access to user desktops for local and remote login with extensions for pure command line sessions. This results in **IO-stream based communications** which is limited but quite simple to implement.

The consequence of this approach is a resulting 2-type category of communications. The first is the forwarding of the display to the user for remote actions, either complete remote desktops or simple remote shells as the managing entity for user sessions. The second is the local execution of the user interface for the management of current session, where the local sessions client opens communications to remote services.

The resulting architecture is a layered architecture modeled as an independent communications service layer and a sessions management layer which is basically peer-to-peer oriented only. Thus the communications is handled on high level abstraction with an addressing abstraction called <machine-address>. The remaining knowledge of communications type for the sessions layer are the two types as basic pattern

DISPLAYFORWARDING

**Question:** In the provided communications model, what enables the communication between the workstation and the server or remote workstation?

**True Answer:** The communication between the workstation and the server or remote workstation is enabled by SSH. ✓

**Text only answer:** In the provided communications model, communication between the workstation and the server or remote workstation is enabled by IO-stream based communications. ✗

Figure E.2: Example question-and-answer pair from the VisR-Bench dataset, highlighting the reliance on both image and surrounding text for accurate responses.

## F COMPARISON OF RETRIEVAL METHOD EFFICIENCY

| Text Extraction |       | Text Encoding |        | Multimodal Encoding |       |
|-----------------|-------|---------------|--------|---------------------|-------|
| PaddleOCR       | 0.275 | BM25          | 0.0001 | CLIP                | 0.022 |
|                 |       | BGE-m3        | 0.131  | SigLip              | 0.109 |
| PDF Parser      | 0.762 | BGE-large     | 0.137  | Col-Paligemma       | 0.140 |
|                 |       | NV-embed-v2   | 0.117  | Col-Phi-3-V         | 0.230 |
|                 |       |               |        | Col-InternVL2       | 0.581 |

Table F.1: Per-page time cost of retrieval methods: The left table presents time cost (seconds) of text-based methods that rely on text extraction techniques, such as OCR models, followed by text encoders to compute page embeddings. The right table presents time cost (seconds) of multi-modal methods that encode the entire page as an image.

## G ADDITIONAL EXPERIMENT RESULTS

We compare our method with text-only baselines using a document parser<sup>3</sup> to highlight the advantages of MLLMs in multi-modal understanding. QA results are reported for the VisR-Bench and MMLongBench-Doc datasets, where PDF files are available.

Table G.1 presents QA results on VisR-Bench and MMLongBench-Doc datasets. To evaluate answer quality for VisR-Bench, where true answers are long and detailed, we introduce the Mean GPT Score (MGS), as string-matching methods often penalize variations in wording for lengthy answers. Instead, we prompt GPT-4o to compare a model’s answer with the ground truth and assign a binary score based on detail alignment.

| QA Module                   | Retrieval Module | Evidence | VisR-B<br>MGS | MMLong<br>G-Acc |
|-----------------------------|------------------|----------|---------------|-----------------|
| <i>Text only QA methods</i> |                  |          |               |                 |
| Phi-3 + parser              | Col-Phi-3-V      | R5       | 14.1          | 29.2            |
| GPT-4o + parser             | Col-Phi-3-V      | R5       | 24.9          | 43.2            |
| GPT-4o + parser             | -                | A        | 27.6          | 42.4            |
| <i>MLLM QA models</i>       |                  |          |               |                 |
| PaliGemma                   | Col-PaliGemma    | R1       | 12.2          | 23.9            |
| Phi-3-V                     | Col-Phi-3-V      | R1       | 24.2          | 30.7            |
| SV-RAG-InternVL2            | Col-InternVL2    | R5       | 25.2          | 33.2            |
| GPT-4o                      | Col-Phi-3-V      | R5       | 47.2          | 55.1            |
| GPT-4o                      | -                | A        | 43.2          | 54.5            |

Table G.1: parser results

Our results indicate that using image evidence consistently outperforms text-only evidence. On VisR-Bench, text-only baselines showed a significant performance drop, emphasizing the dependency of questions on both image and text. However, the MGS of text-only baselines is not zero, likely because the model leverages text from a broader context rather than relying solely on the surrounding text, enabling it to extract relevant information even in the absence of visual input.

Additionally, reducing input pages with the retrieval module improved GPT-4o’s performance with image evidence, aligning with the findings in Table 2. In contrast, retrieval did not enhance GPT-4o’s performance on VisR-Bench in the text-only setting, likely because the evidence pages lacked sufficient information to fully address the questions. Including additional context in such cases might yield better results.

<sup>3</sup>Adobe Extract API: <https://developer.adobe.com/document-services/apis/pdf-extract/>
